# Supplementary material for: Transcriptome Analysis of Gene Families Involved in Chemosensory Function in Spodoptera littoralis (Lepidoptera: Noctuidae)
Source: PubMed Central journal article supplement (PMC6540431; doi:10.1186/s12864-019-5815-x), 2019-05-28

MVA MVPR MVBR NTC

FVA FVPR FVBR

SlitRPL8

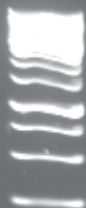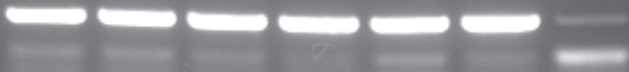

MVA MVPR MVBR NTC

FVA FVPR FVBR

SlitOrco

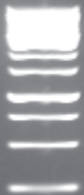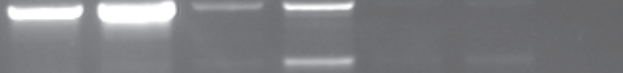

MVA MVPR MVBR NTC  
FVA FVPR FVBR

SlitOR14

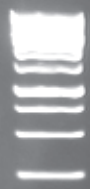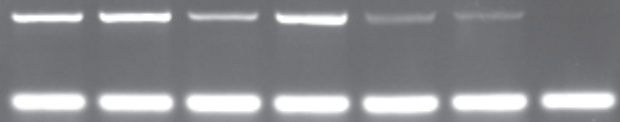

Not  
Applicable

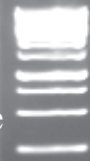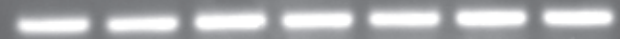

Not  
Applicable

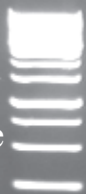

MVA

MVPR

MVBR

NTC

FVA

FVPR

FVBR

SlitOR25

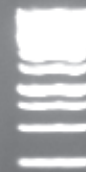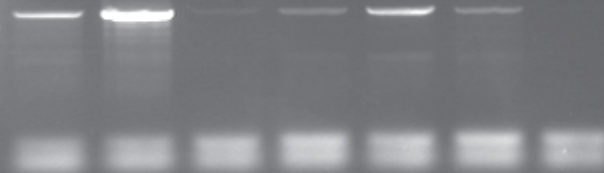

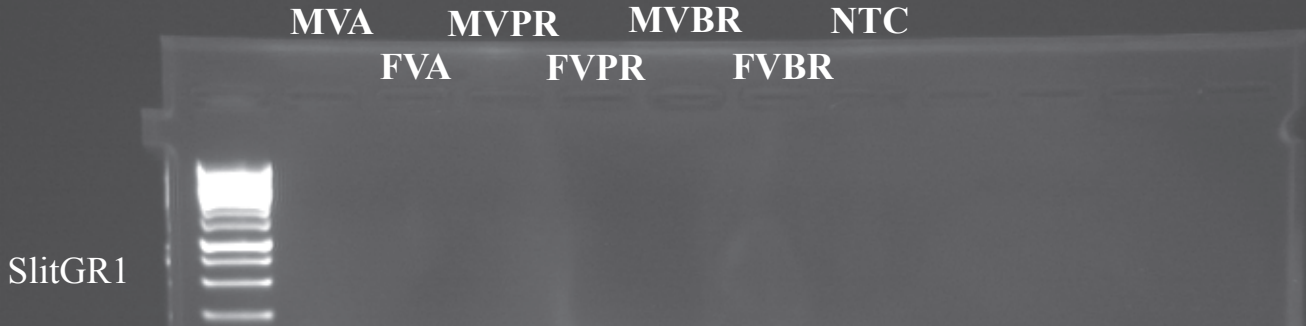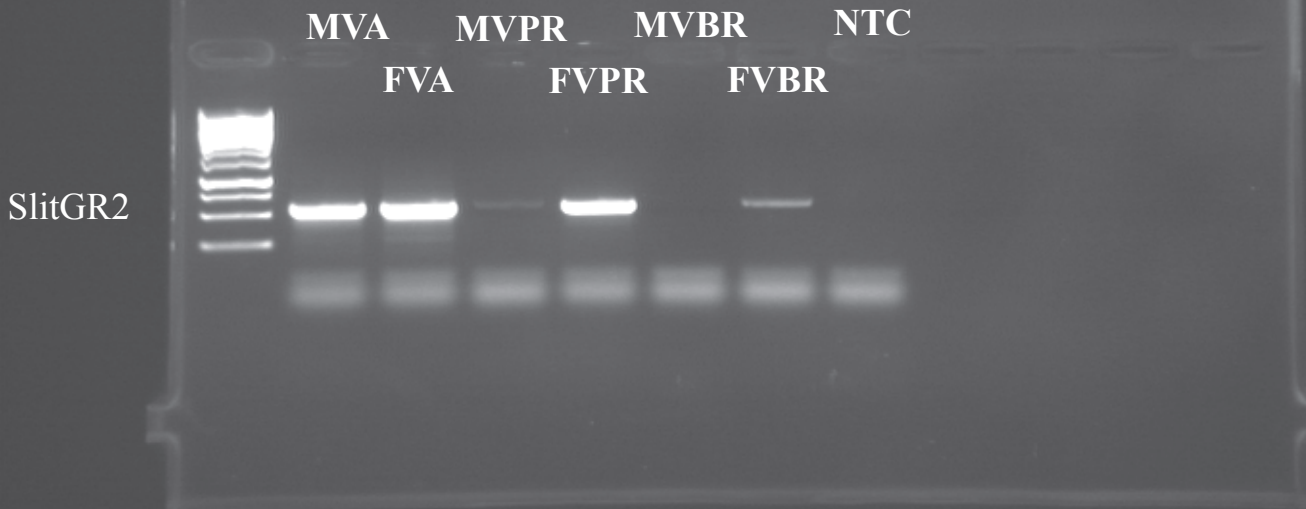

MVA

MVPR

MVBR

NTC

FVA

FVPR

FVBR

SlitGR3

Not  
Applicable

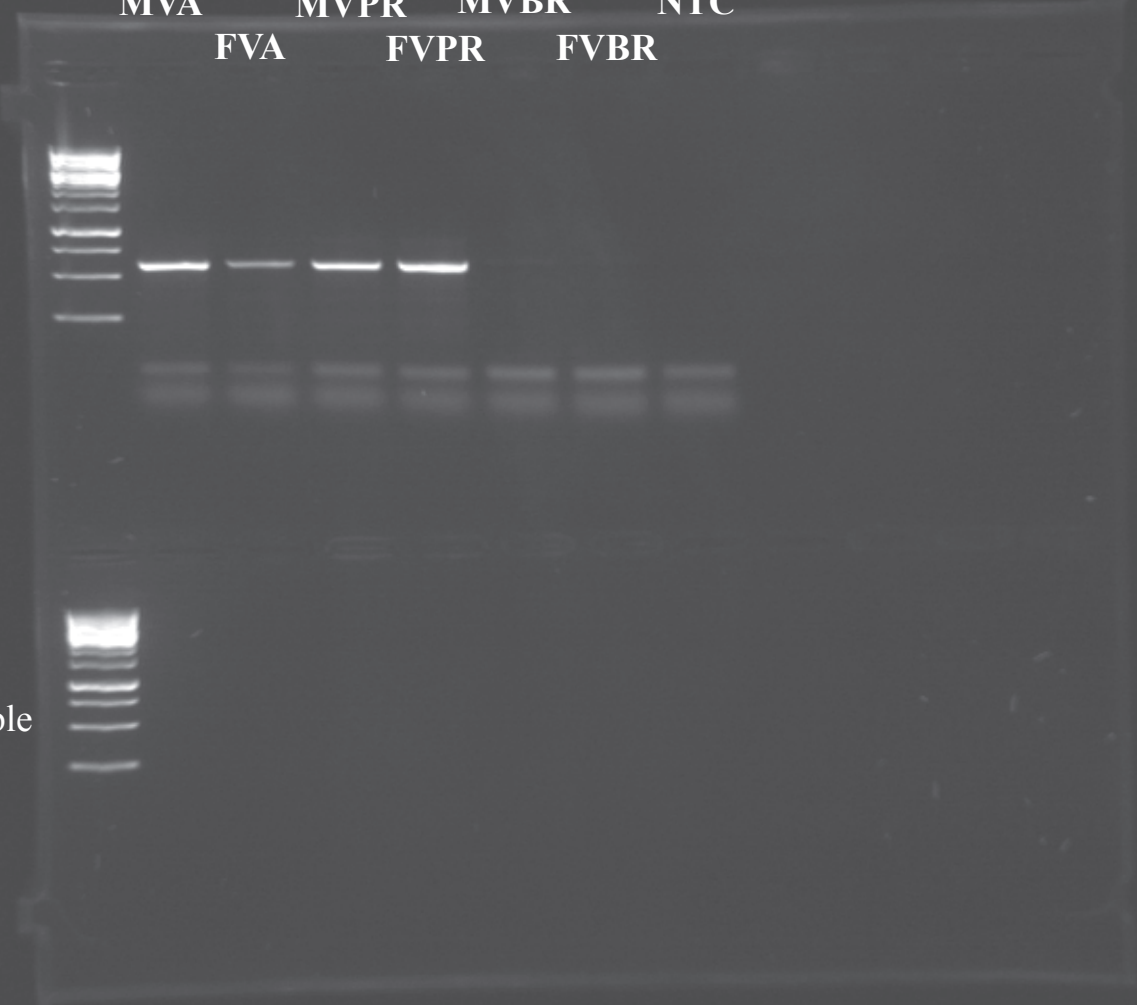



MVA

MVPR

MVBR

NTC

FVA

FVPR

FVBR

SlitIR8a

Not  
Applicable

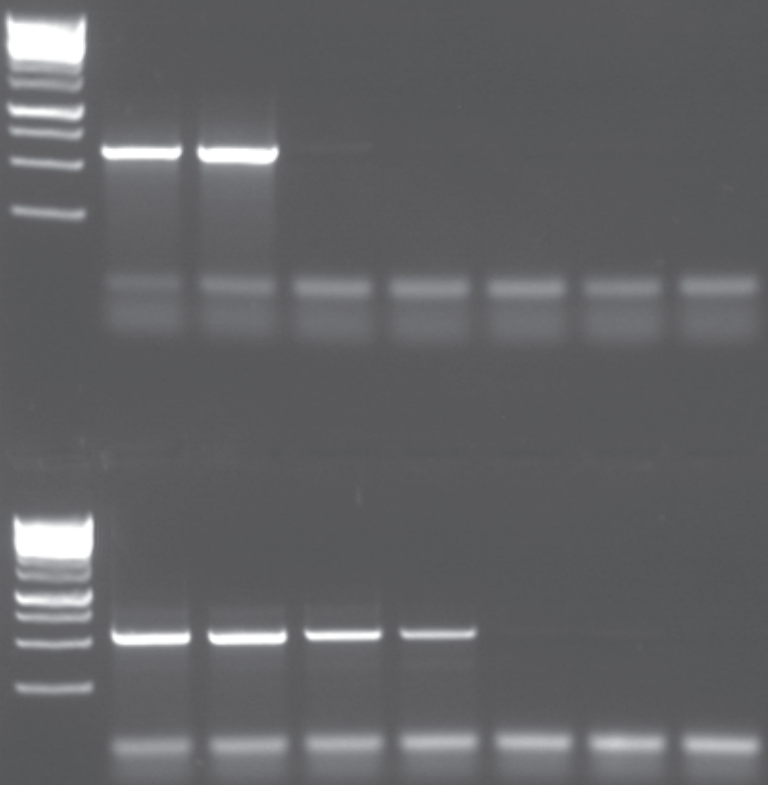

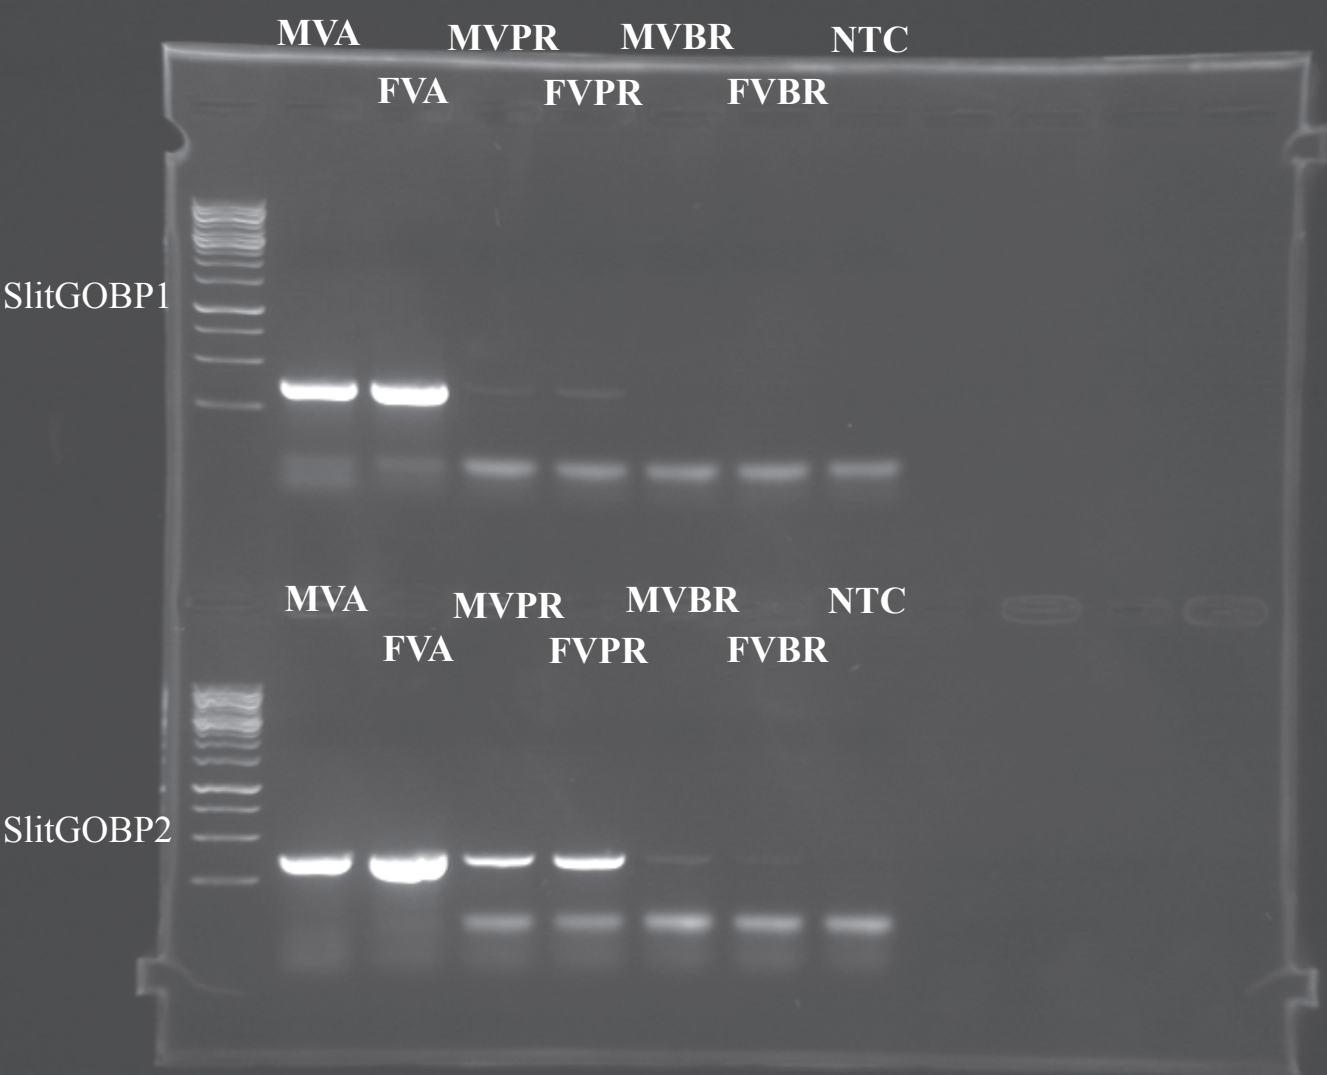



MVA MVPR MVBR NTC  
FVA FVPR FVBR

SlitPBP1

MVA MVPR MVBR NTC  
FVA FVPR FVBR

SlitPBP2

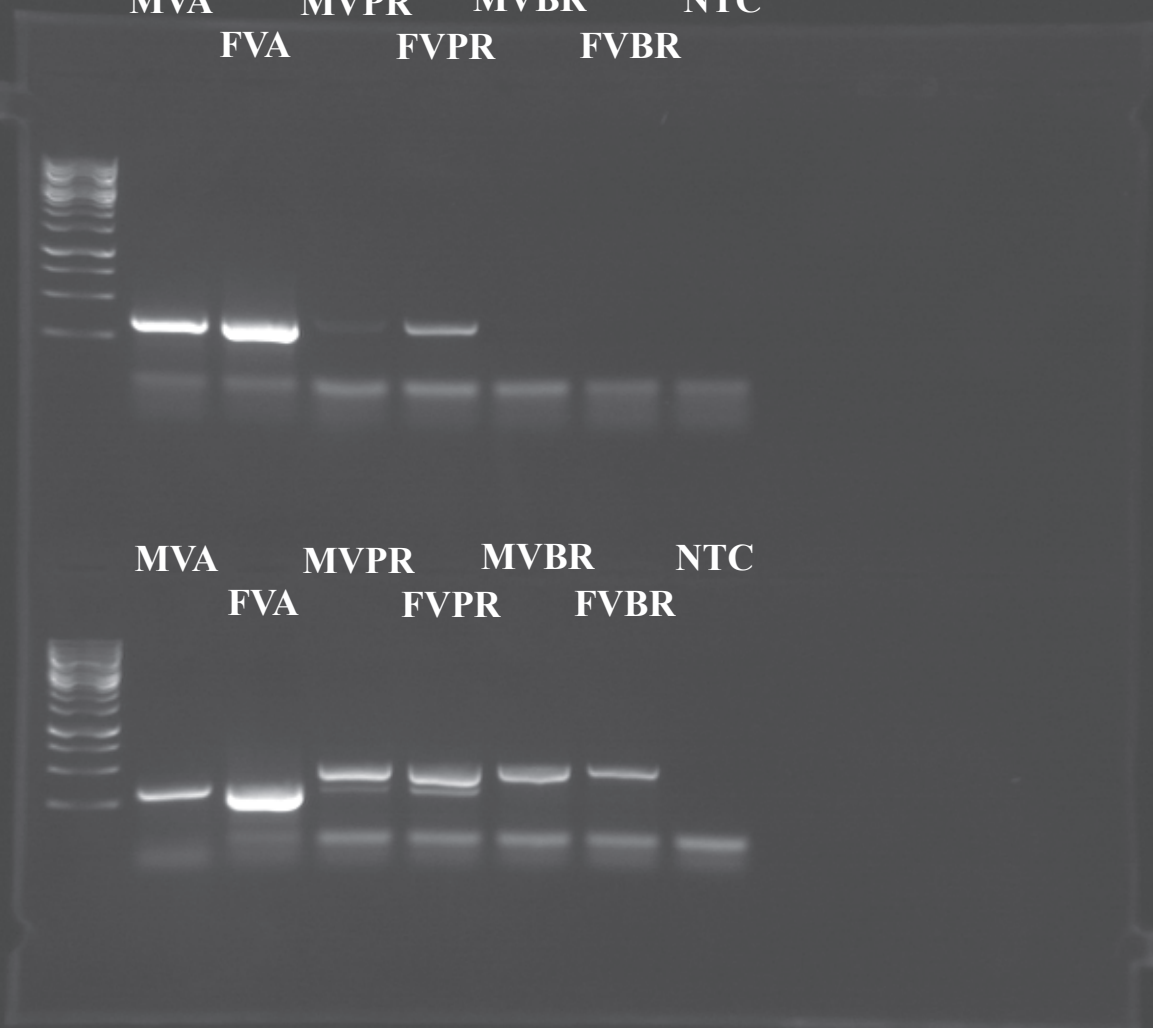

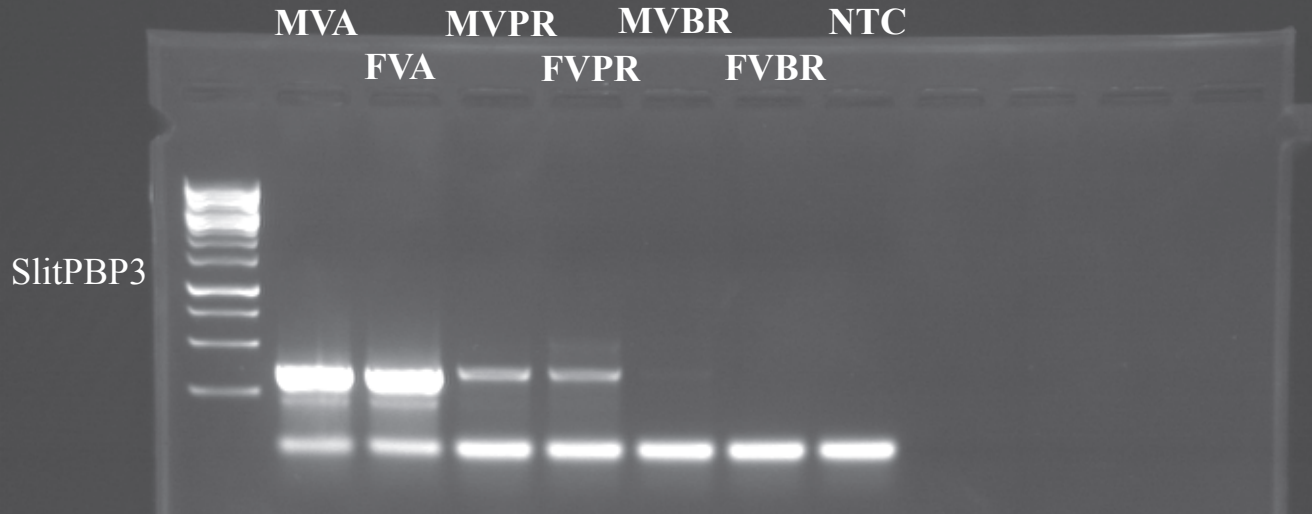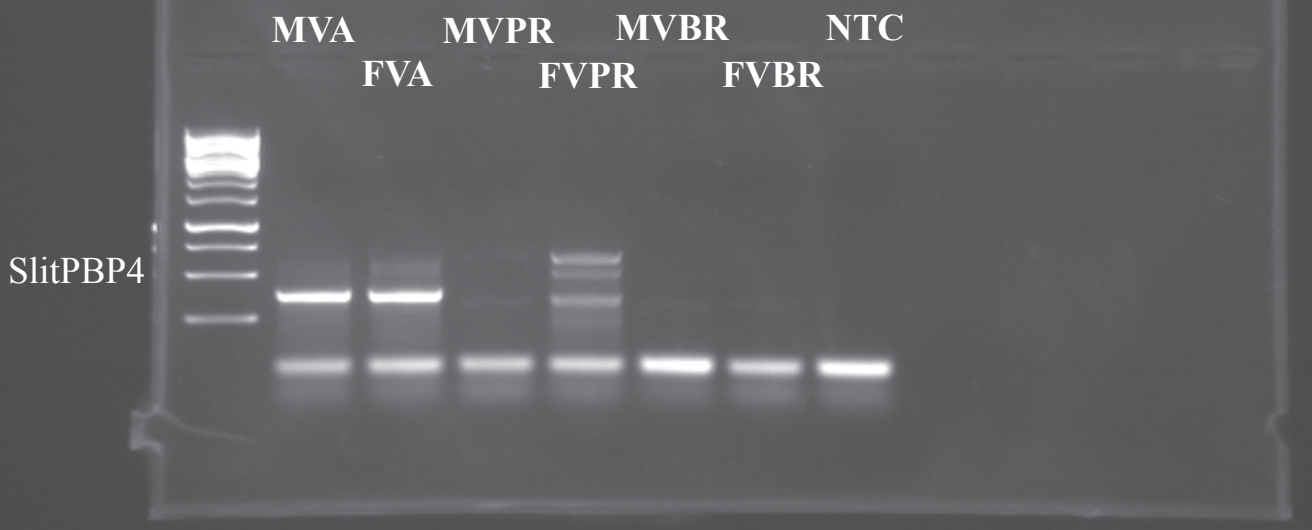

MVA MVPR MVBR NTC  
FVA FVPR FVBR

SlitSNMP1

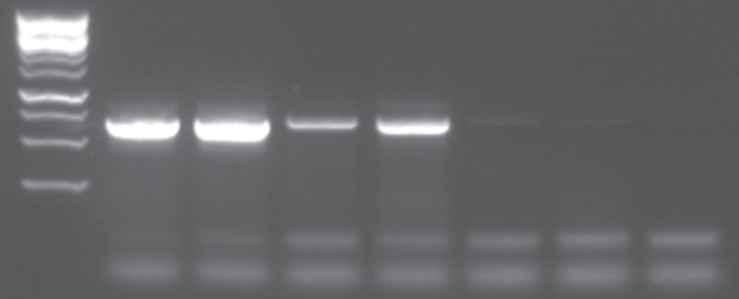

MVA MVPR MVBR NTC  
FVA FVPR FVBR

SlitSNMP2

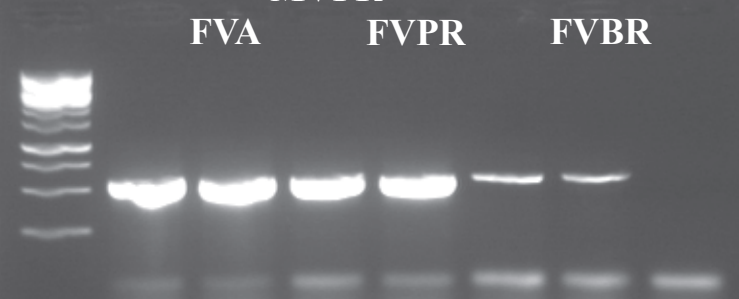

Supplement: 12864_2019_5815_MOESM23_ESM.pdf [file 12864_2019_5815_MOESM23_ESM.pdf]
