# Supplementary material for: Transcriptome Analysis of Gene Families Involved in Chemosensory Function in Spodoptera littoralis (Lepidoptera: Noctuidae)
Source: PubMed Central journal article supplement (PMC6540431; doi:10.1186/s12864-019-5815-x), 2019-05-28

NORT

SlitRPL8

SlitOrco

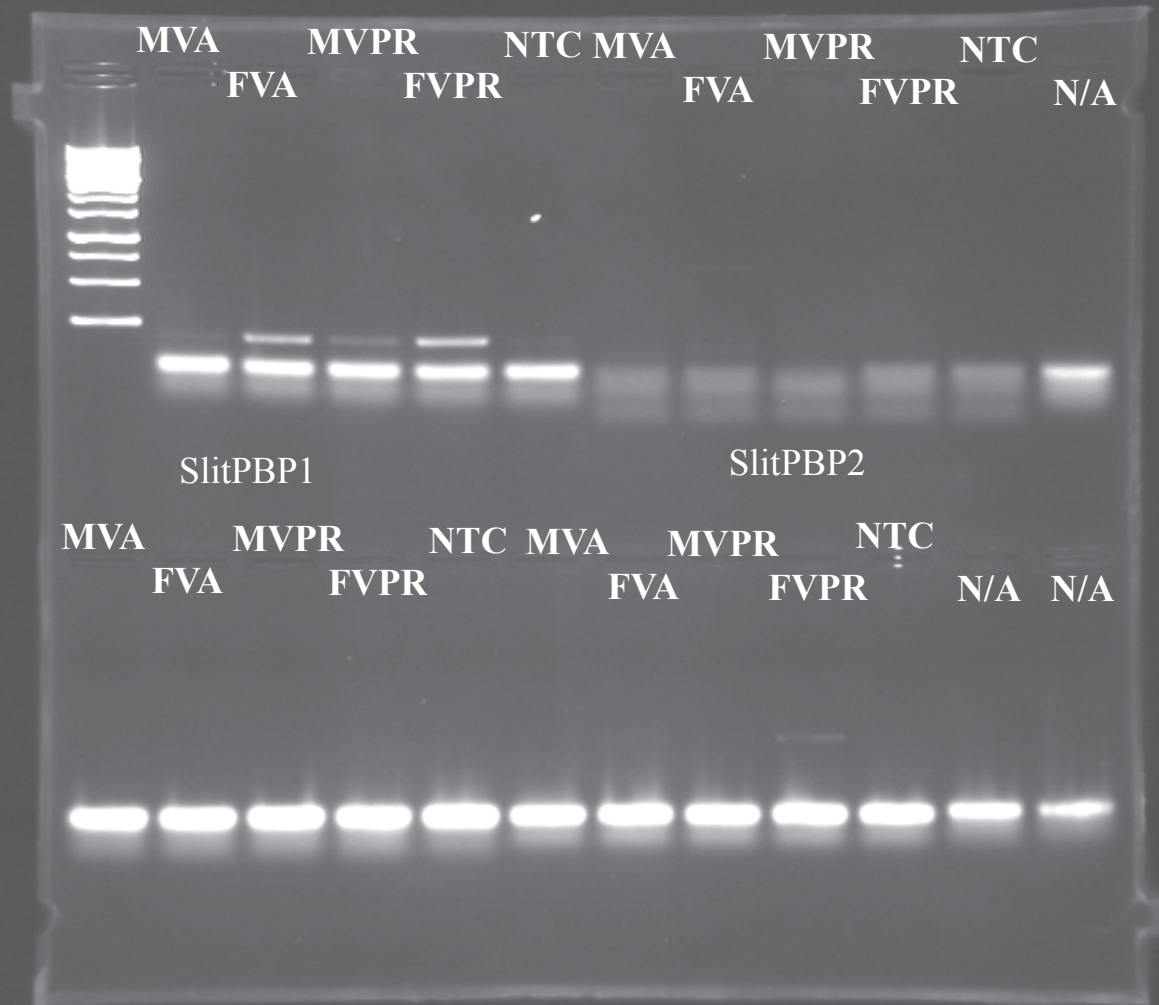

NORT

SlitGR3

MVA FVA MVPR FVPR NTC MVA FVA MVPR FVPR NTC

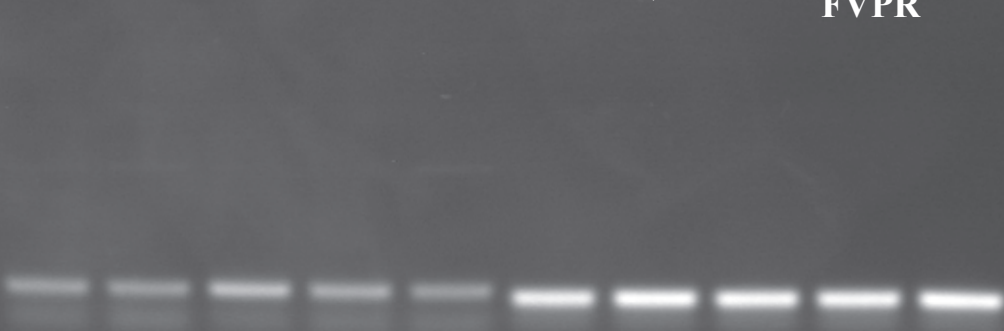

SlitGOBP2

SlitPBP3

MVA FVA MVPR FVPR NTC MVA FVA MVPR FVPR NTC

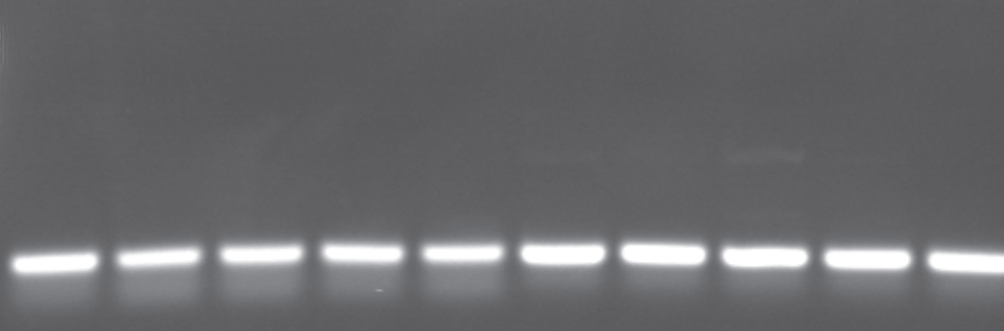

NORT

SlitGR230

SlitGR2

MVA MVPR NTC MVA MVPR NTC  
FVA FVPR FVA FVPR

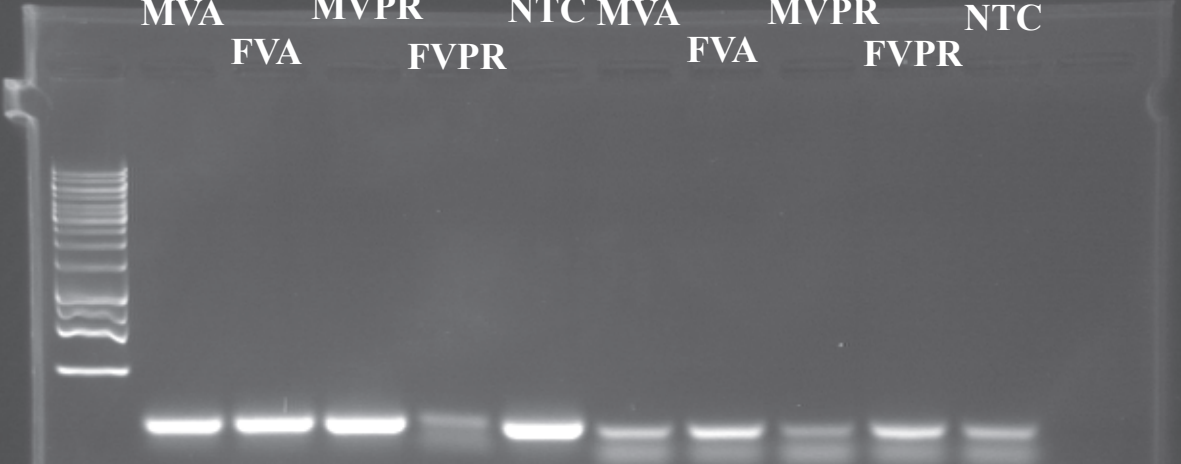

SlitOR14

SlitOR25

MVA MVPR NTC MVA MVPR NTC  
FVA FVPR FVA FVPR

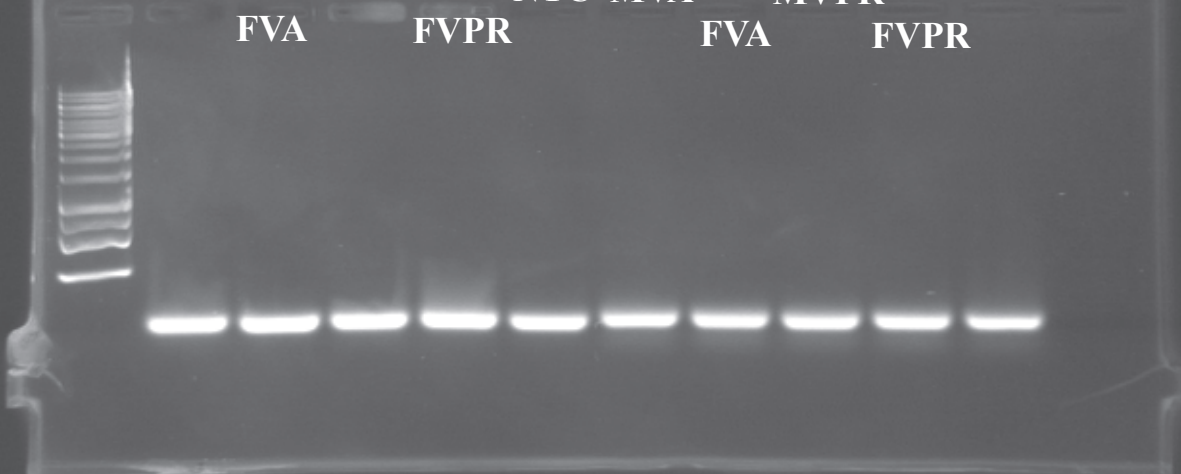

NORT

SlitSNMP1

MVA FVA MVPR FVPR NTC MVA FVA MVPR FVPR NTC

SlitSNMP2

MVA FVA MVPR FVPR NTC

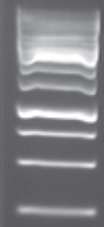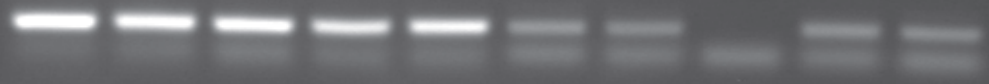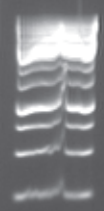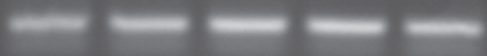

NORT

SlitRPL8

SlitOrco

SlitOR14

SlitOR25

MVBR

NTC

MVBR

NTC

MVBR

NTC

MVBR

FVBR

FVBR

FVBR

FVBR

SlitOR25

SlitGR88

SlitGR2

SlitGR3

NTC

MVBR

NTC

MVBR

NTC

MVBR

NTC

FVBR

FVBR

FVBR

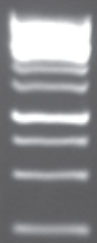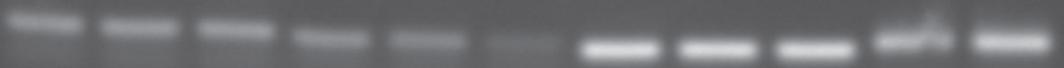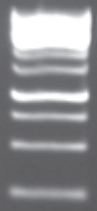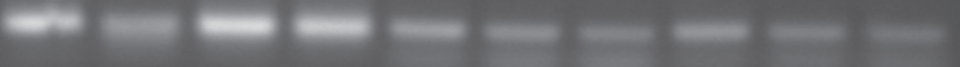

NORT

SlitGOBP1

SlitGOBP2

SlitPBP1

SlitPBP2

MVBR

NTC

MVBR

NTC

MVBR

NTC

MVBR

FVBR

FVBR

FVBR

FVBR

SlitPBP2

SlitPBP3

SlitPBP4

SlitSNMP1

NTC

MVBR

NTC

MVBR

NTC

MVBR

NTC

FVBR

FVBR

FVBR

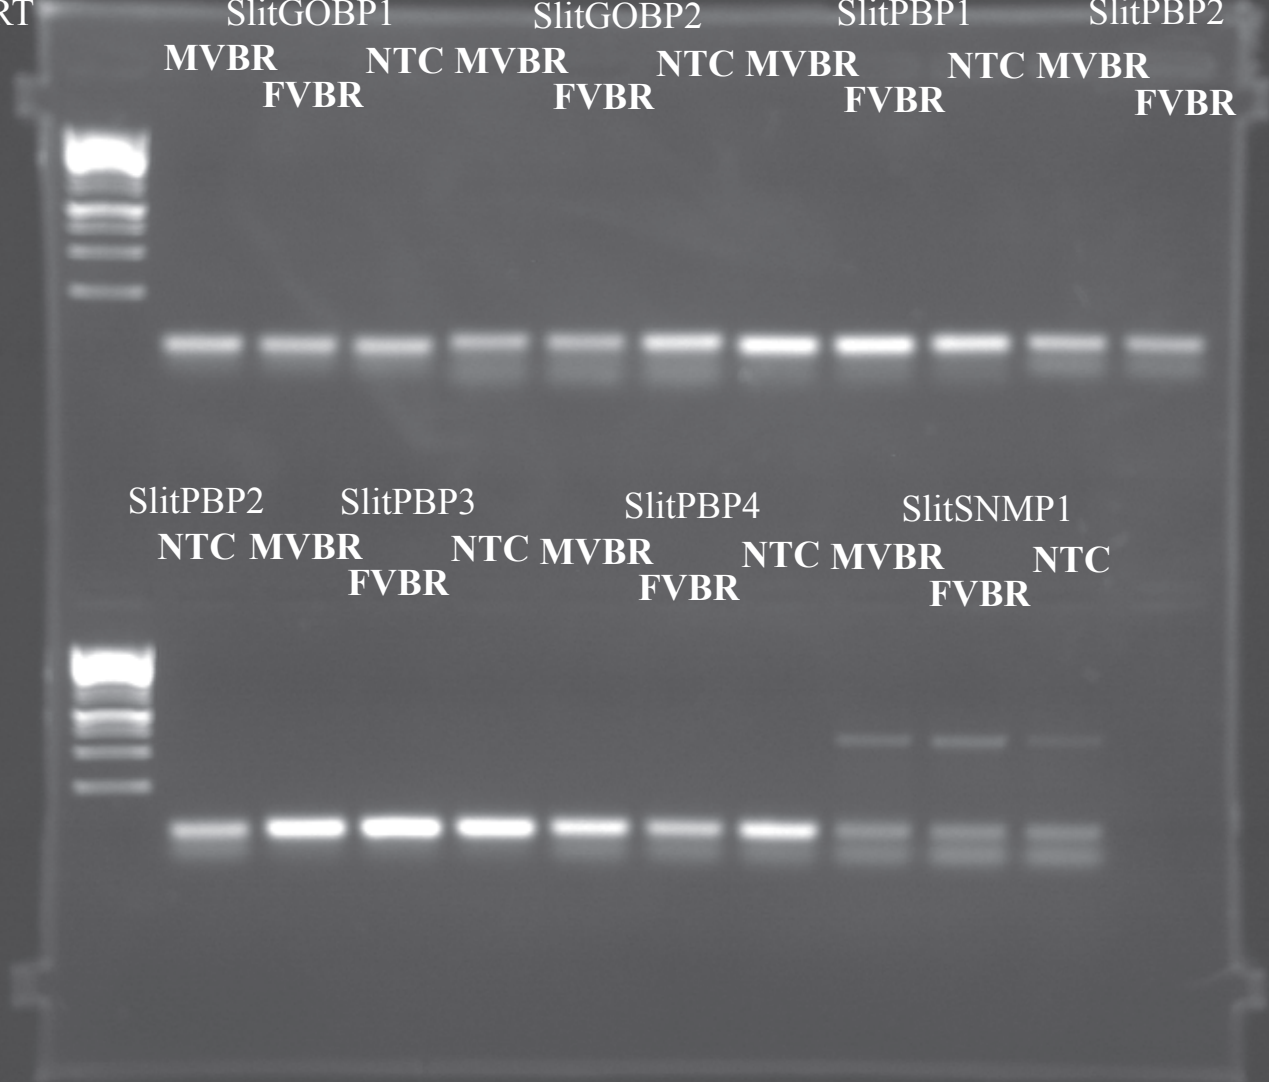



NORT  
SlitSNMP2

Not Applicable

MVBR NTC  
FVBR

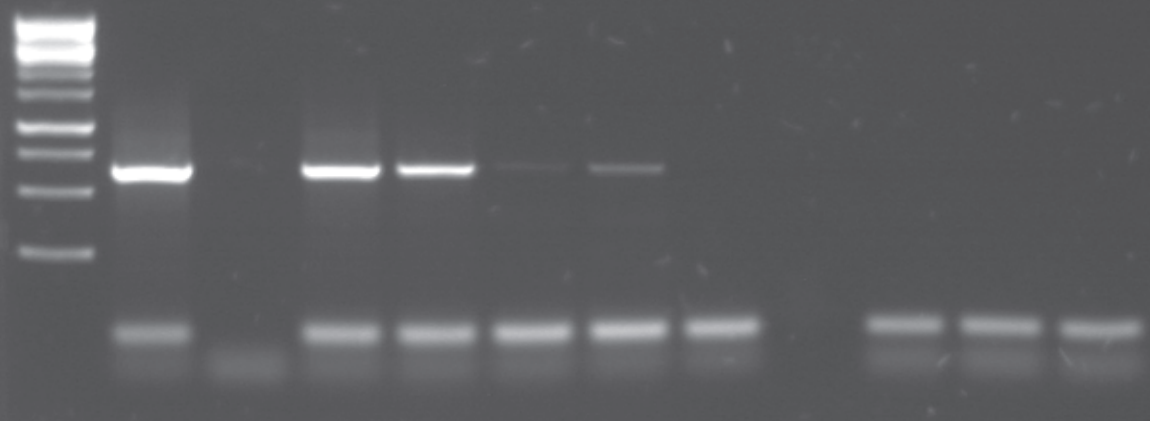

Not Applicable

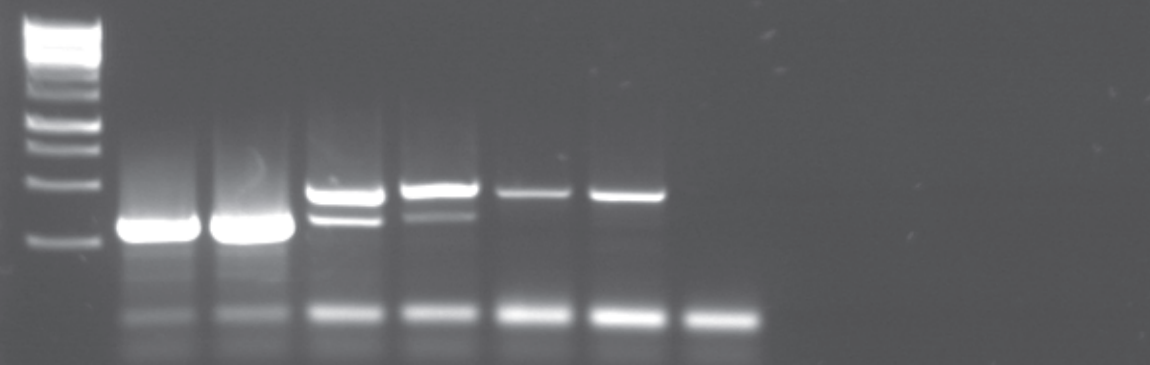

NORT

MVA

FVA

Slit1R8a

MVPR

FVPR

MVBR

FVBR

Not Applicable

Not Applicable

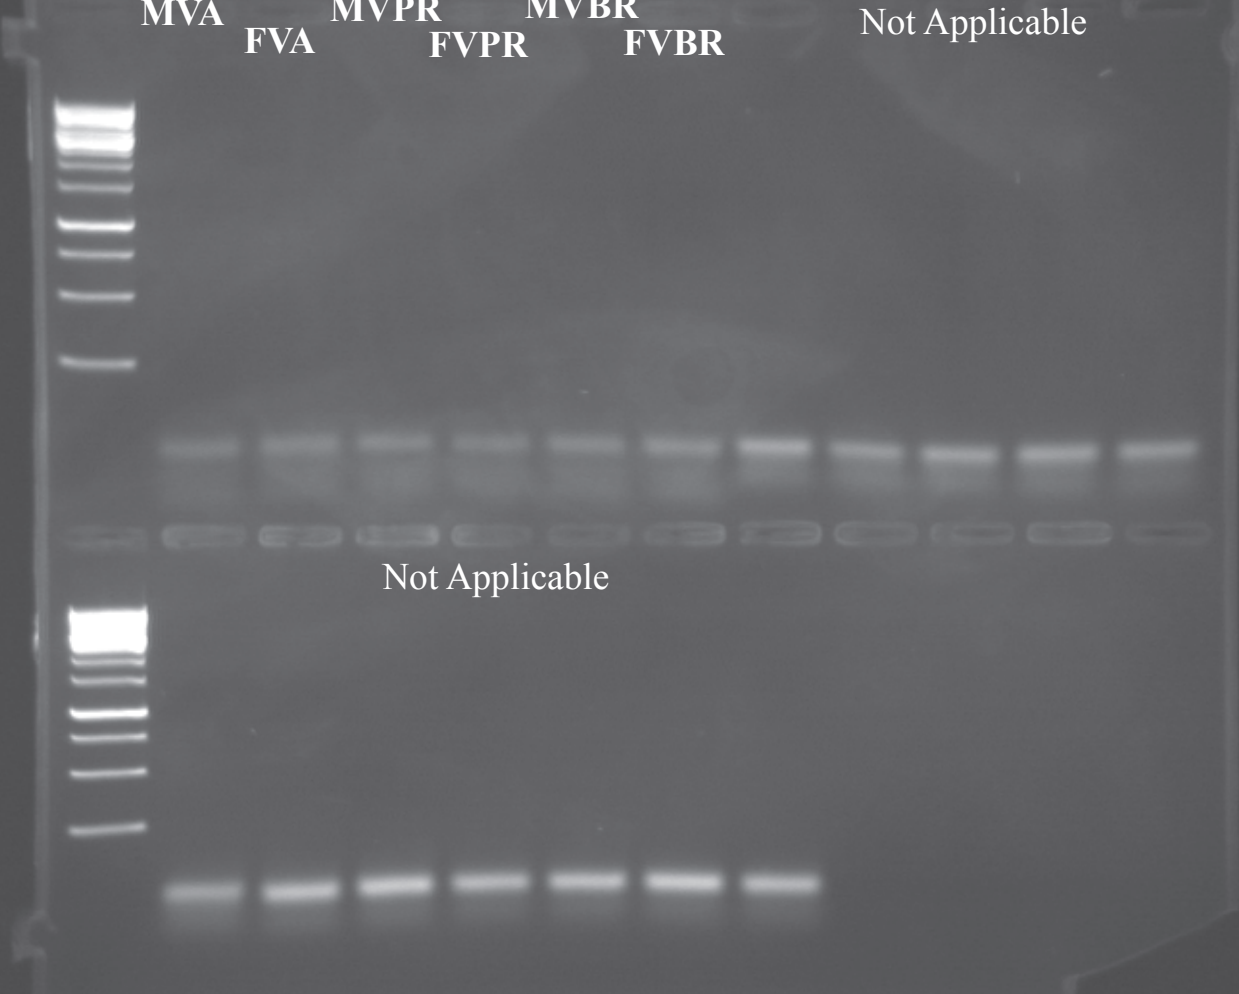

Supplement: 12864_2019_5815_MOESM24_ESM.pdf [file 12864_2019_5815_MOESM24_ESM.pdf]
