# Supplementary material for: Transcriptome Analysis of Gene Families Involved in Chemosensory Function in Spodoptera littoralis (Lepidoptera: Noctuidae)
Source: PubMed Central journal article supplement (PMC6540431; doi:10.1186/s12864-019-5815-x), 2019-05-28

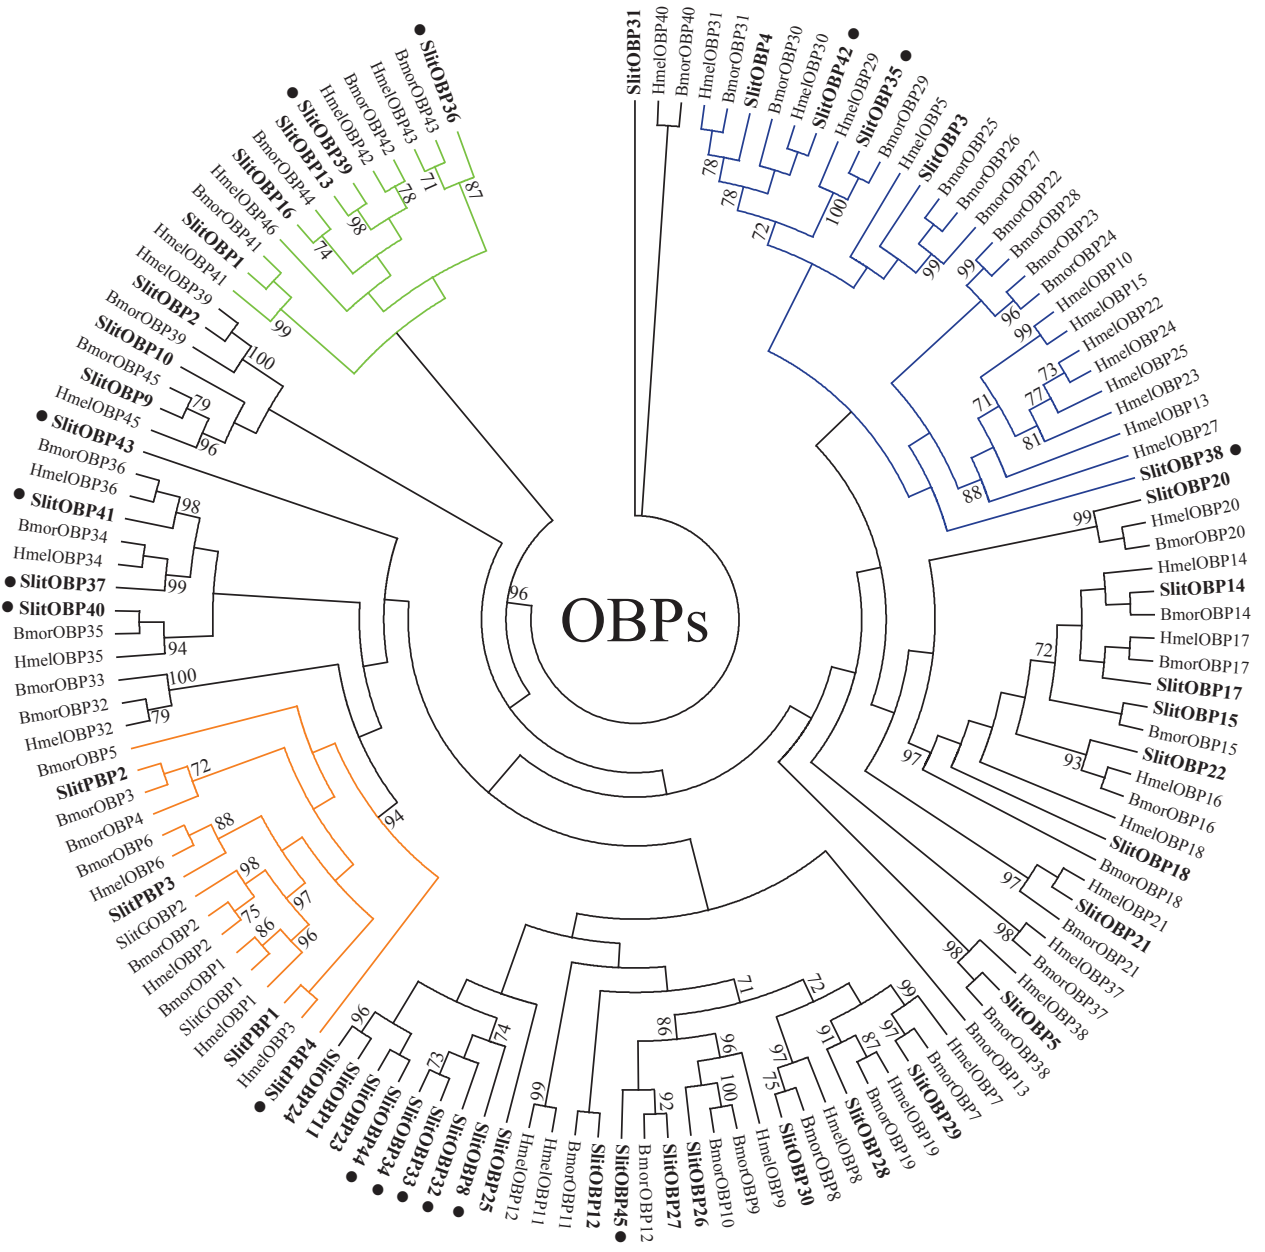

Supplement: 12864_2019_5815_MOESM11_ESM.pdf [file 12864_2019_5815_MOESM11_ESM.pdf]
